# Supplementary material for: Activity of Omadacycline Alone and in Combination against Carbapenem-Nonsusceptible Acinetobacter baumannii with Varying Minocycline Susceptibility
Source: PubMed Central journal article supplement (PMC9241703; doi:10.1128/spectrum.00542-22), 2022-06-01

Figure S1. Mean log<sub>10</sub> CFU/mL vs. time profiles for omadacycline, amikacin, meropenem, and rifampin alone vs. each respective omadacycline-based dual drug combination at fC<sub>max</sub> against each of the 5 minocycline susceptible *A. baumannii* strains. Curves represent average concentrations from triplicate experiments. Abbreviations: GC, growth control; OMC, omadacycline; AMK, amikacin; MER, meropenem; RIF, rifampin.

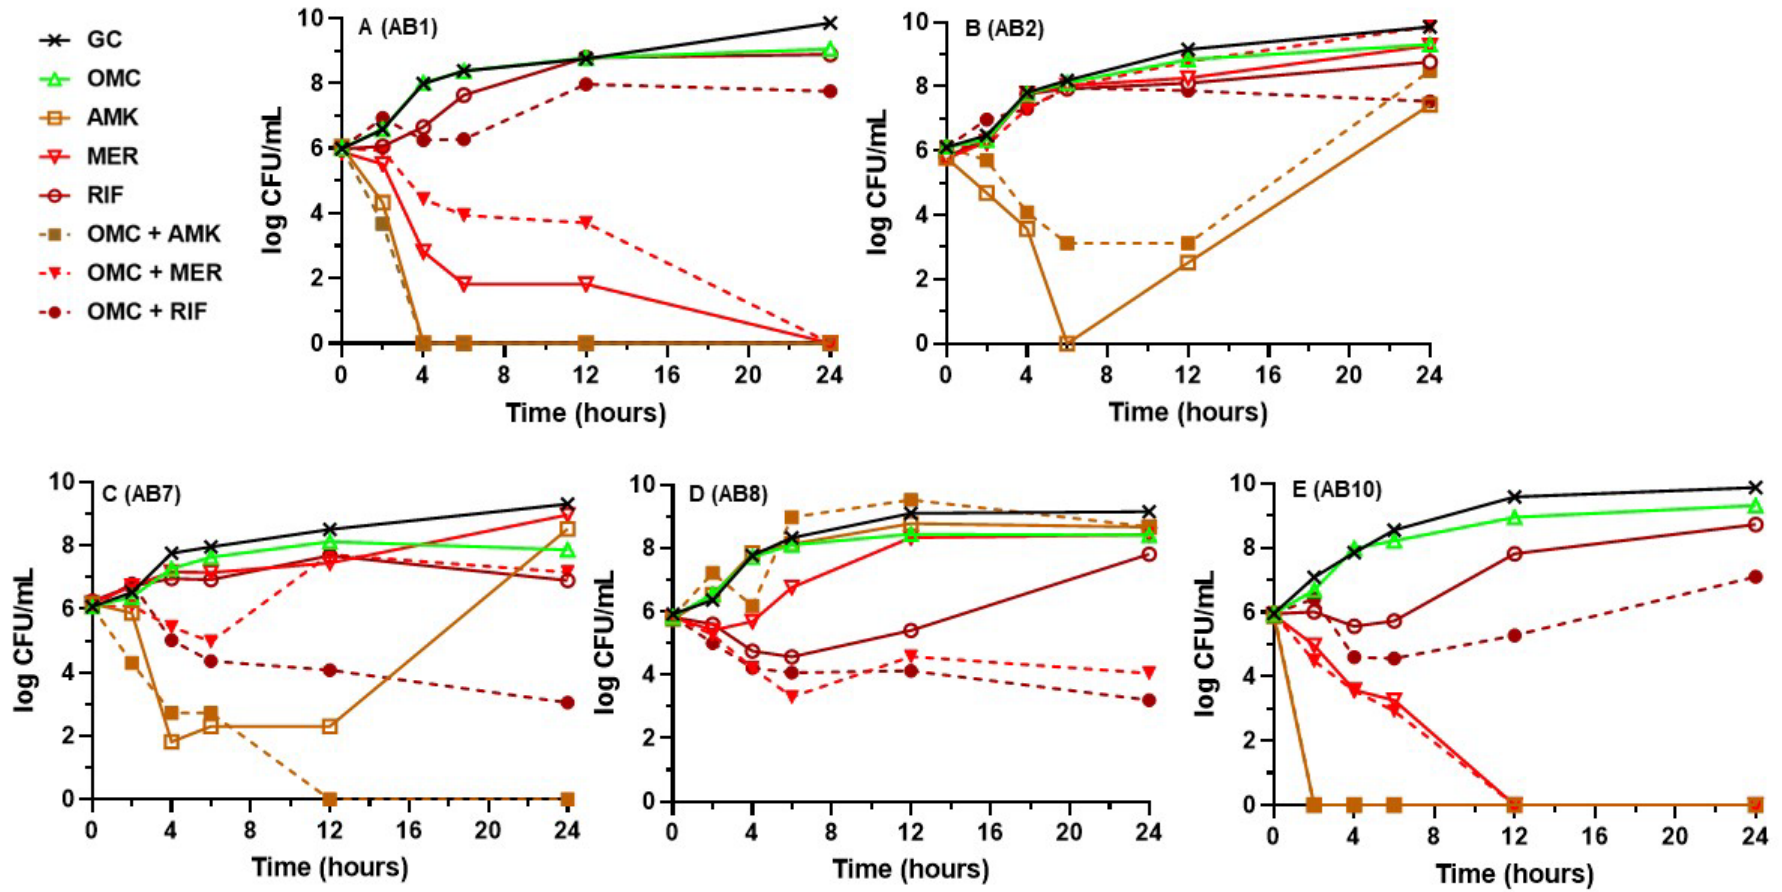

Figure S2. Mean log<sub>10</sub> CFU/mL vs. time profiles for omadacycline, amikacin, meropenem, and rifampin alone vs. each respective omadacycline-based dual drug combination at *f*C<sub>max</sub> against each of the 5 minocycline-non-susceptible *A. baumannii* strains. Curves represent average concentrations from triplicate experiments. Abbreviations: GC, growth control; OMC, omadacycline; AMK, amikacin; MER, meropenem; RIF, rifampin.

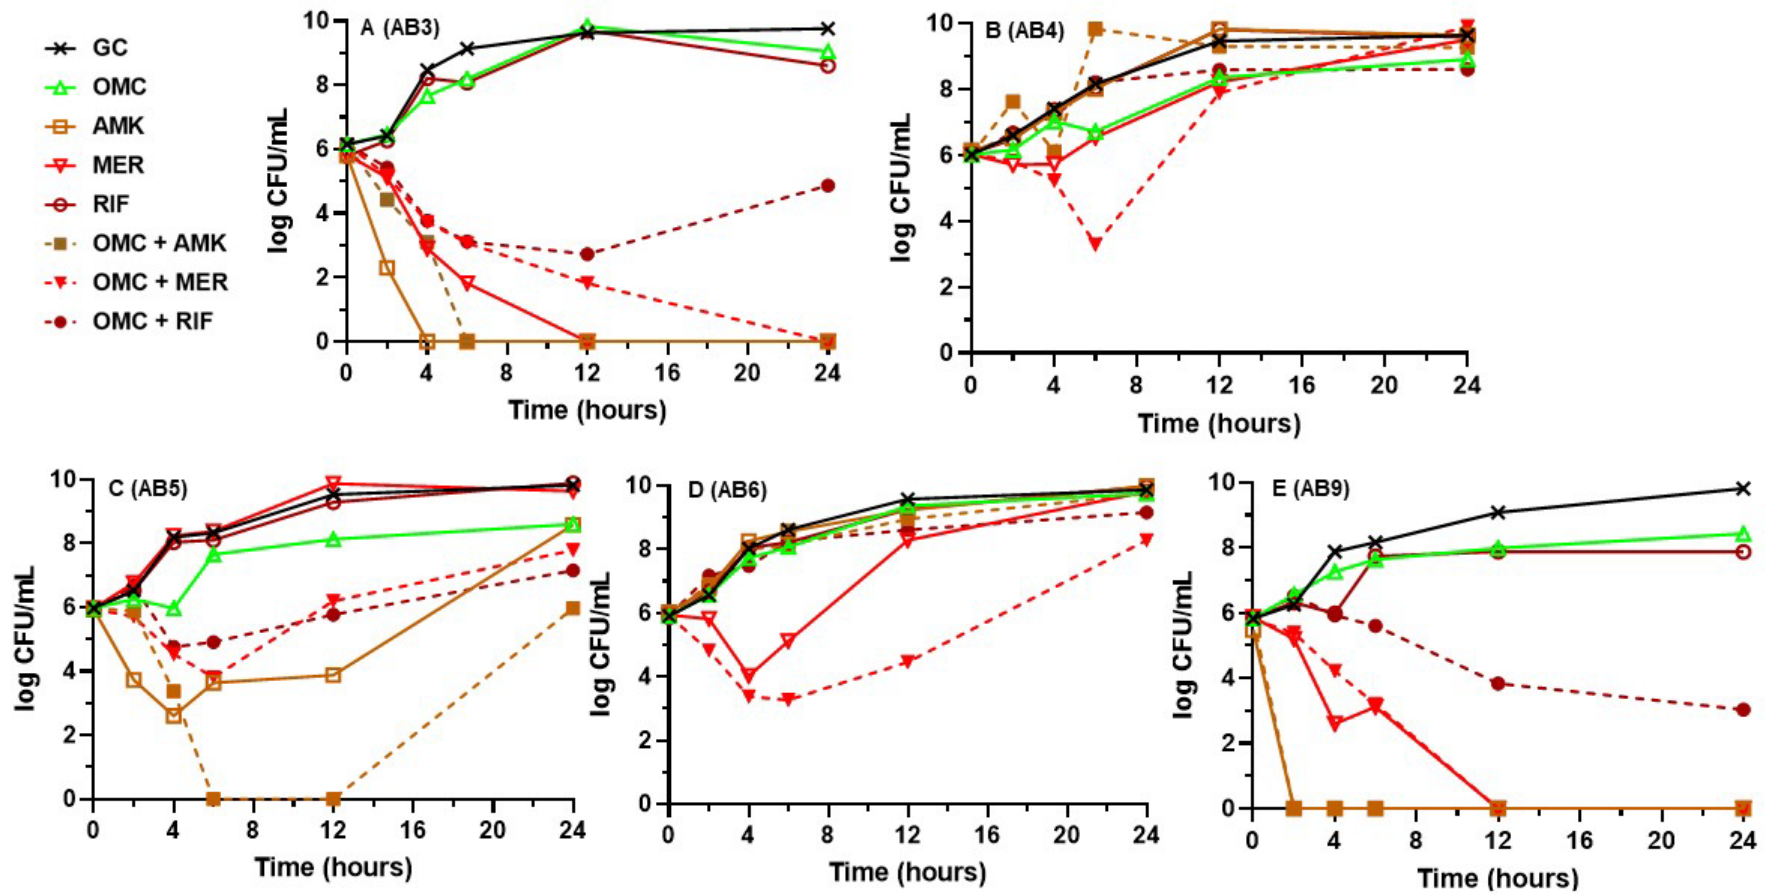

Supplement: spectrum.00542-22-s0001.pdf [file spectrum.00542-22-s0001.pdf]
